# Supplementary material for: Mitochondria-Targeted Nitronyl Nitroxide Radical Nanoparticles for Protection against Radiation-Induced Damage with Antioxidant Effects
Source: MDPI journal article supplement (doi:10.3390/cancers16020351), 2024-01-13
Supplement: s1 [file s1]

# Electronic Supporting Information

## Mitochondrial-targeted nitronyl nitroxide radicalnanoparticles for protection against radiation-induced damage with antioxidant effect

Shigao Huang <sup>1,2\*,†</sup>, Min Xu <sup>3,†</sup>, Qingyue Da <sup>4</sup>, Linlin Jing <sup>4</sup> and Haibo Wang <sup>3,\*</sup>

<sup>1</sup> Department of Cell Biology, National Translational Science Center for Molecular Medicine, The Air Force Medical University, Xi'an 710032, China

<sup>2</sup> Department of Radiation Oncology, Xijing Hospital, The Air Force Medical University, Xi'an 710032, China

<sup>3</sup> Department of Chemistry, School of Pharmacy, The Air Force Medical University, Xi'an 710032, China

<sup>4</sup> Centre for Translational Medicine, The First Affiliated Hospital, Xi'an Jiaotong University, Xi'an 710061, China; daqy21@lzu.edu.cn (Q.D.); jinglinlin@xjtufh.edu.cn (L.J.)

\* Correspondence: huangshigao2010@aliyun.com (S.H.); haibo7691@fmmu.edu.cn (H.W.)

† These authors contributed equally to this work.

### 1. Chemical Materials

2,3-Bis(hydroxylamino)-2,3-dimethylbutane was synthesized in our laboratory<sup>[1]</sup>. The chemical reagents were purchased from Aladdin Ltd. (Shanghai, China). CH<sub>2</sub>Cl<sub>2</sub> was distilled in the presence of CaH<sub>2</sub>, and THF was distilled with sodium/benzophenone under nitrogen protection. All chemicals were of commercial analytical reagent grade.

### 2. Synthetic methods

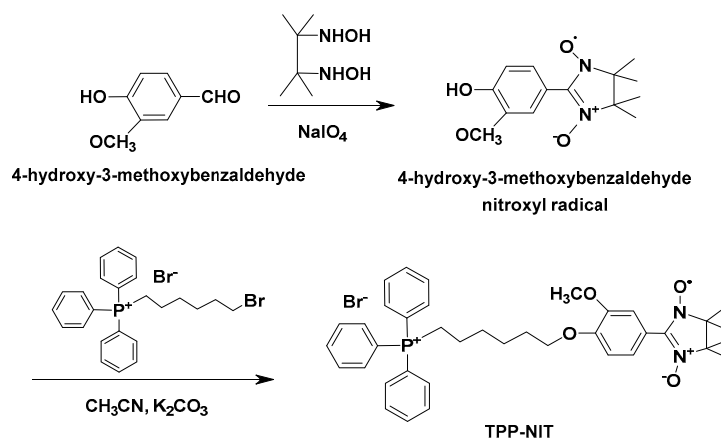

Scheme S1. The synthesis method for preparation of TPP-NIT.

**2.1 Procedure for the preparation of (4-hydroxy-3-methoxyphenyl)-4,4,5,5-tetramethyl-4,5-dihydro imidazole radical (scheme 1).** A solution of 4-hydroxy-3-methoxybenzaldehyde (0.76 g, 5 mmol) and 2,3-bis (hydroxylamino)-2,3-dimethylbutane (0.74 g, 5 mmol) in methanol (20 ml) was stirred at room temperature for 12 h. After the end of the reaction, the solvent was removed and the residue was suspended in 200 ml  $\text{CH}_2\text{Cl}_2$ . The saturated aqueous solution of  $\text{NaIO}_4$  was dropwised slowly to the mixture solution and stirred at  $0^\circ\text{C}$  until the reaction solution appears dark blue. The organic phase was separated, and the aqueous phase was extracted with  $\text{CH}_2\text{Cl}_2$  (20 mL $\times$ 3). The combined organic layers were dried over anhydrous  $\text{Na}_2\text{SO}_4$ . The deep blue solution was then evaporated. The crude product was purified by column chromatography on silica gel using absolute ethyl acetate/*n*-hexane (1:3) as eluent, giving a deep blue solid product (1.16 g, 83.1 %). m.p.  $96.5\text{--}98.1^\circ\text{C}$ . IR(KBr):  $\nu$  3355 (OH), 1388, 1353 (N-O), 1215, 1122 (C-O-C)  $\text{cm}^{-1}$ . HRMS (ESI):  $m/z$   $[\text{M}+\text{Na}]^+$  calcd for  $\text{C}_{28}\text{H}_{28}\text{ClN}_4\text{O}_2$ : 302.1243, Found: 302.1250.

**2.2 Synthesis of (4-(6-(triphenylphosphonio)hexyloxy)phenyl)-3-methoxyphenyl)-4,4,5,5-tetramethyl-4,5-dihydro imidazole radical (TPP-NIT).** The synthetic route for the synthesis of TPP-NIT was shown in Scheme 1. 0.199 g (0.8 mmol) of (4-hydroxy-3-methoxyphenyl)-4,4,5,5-tetramethyl-4,5-dihydro imidazole radical, 0.28 g (1.0 mmol) of 6-bromohexylphosphine bromide and 0.138 g (1.0 mmol) of  $\text{K}_2\text{CO}_3$  were dissolved in 30 ml acetonitrile. The mixture was stirred and reacted at  $60^\circ\text{C}$  for 8 h. Thin layer chromatography (TLC) was used to monitor the reaction process. When the reaction was complete, the solution

was filtrated and the solvent was removed under vacuum to obtain a crude blue liquid. Then the crude blue liquid was purified by column chromatography (the eluent was dichloromethane: methanol = 12:1) to obtain dark blue oil. Yield 72.5%. IR(KBr):  $\nu$  1357, 1265 (N-O), 1114 (C-O)  $\text{cm}^{-1}$ . HRMS (ESI):  $m/z$   $[\text{M}-\text{Br}]^+$  calcd for  $\text{C}_{28}\text{H}_{28}\text{ClN}_4\text{O}_2$ : 624.3111, Found: 624.3101.

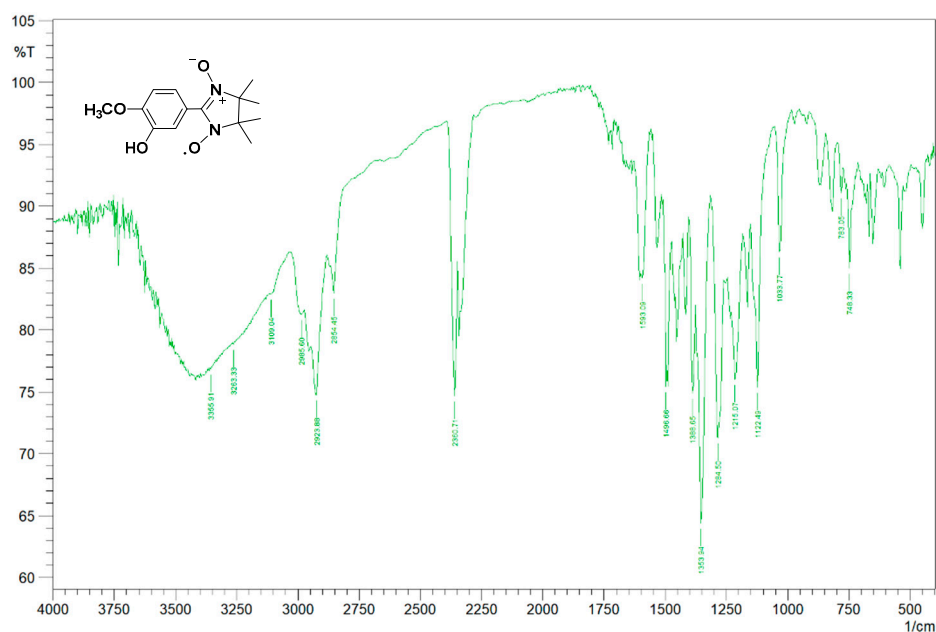

**Figure S1.** The IR spectrum of 4-hydroxy-3-methoxybenzaldehyde nitroxyl radical.

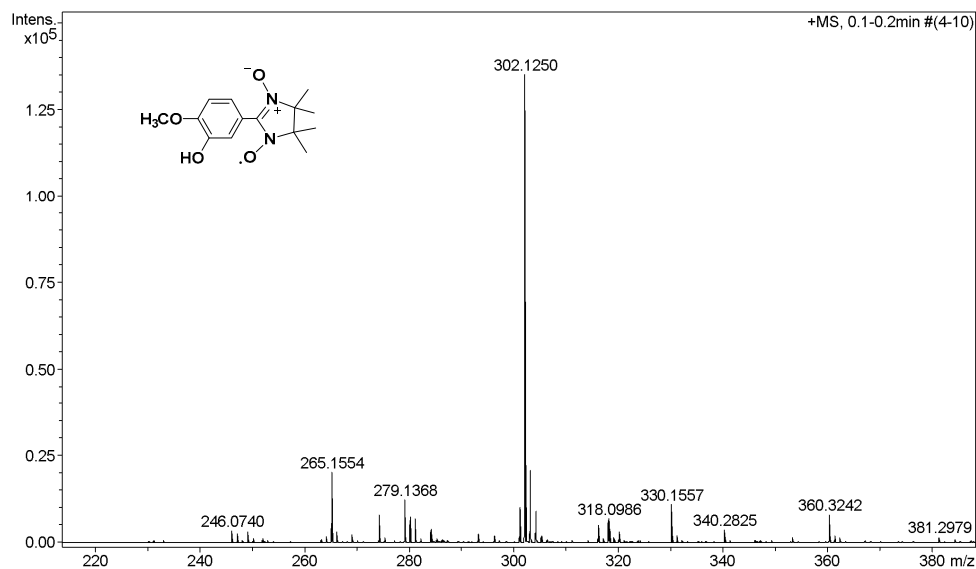

**Figure S2.** The HRMS spectrum of 4-hydroxy-3-methoxybenzaldehyde nitroxyl radical.

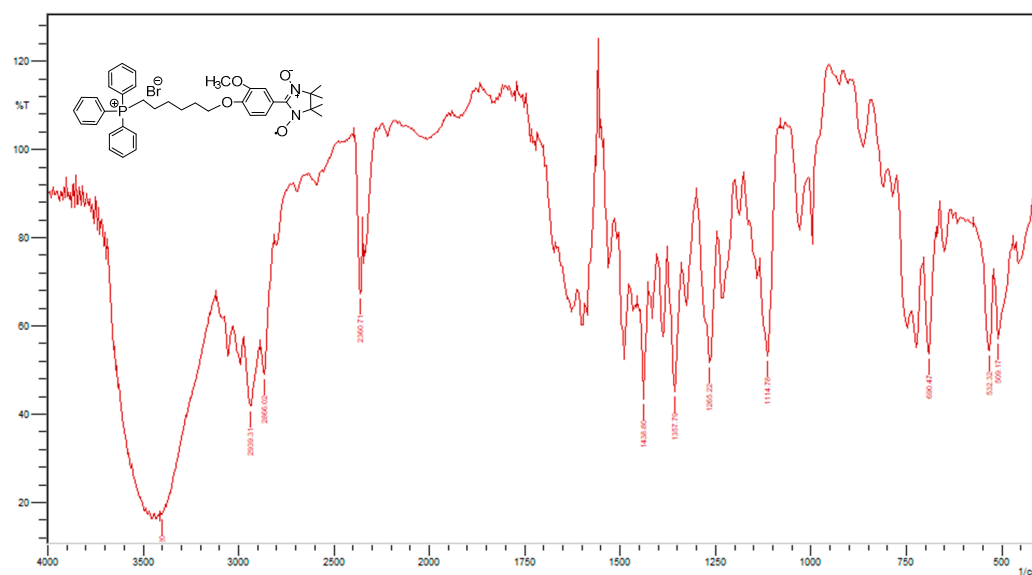

**Figure S3. The IR spectrum of TPP-NIT.**

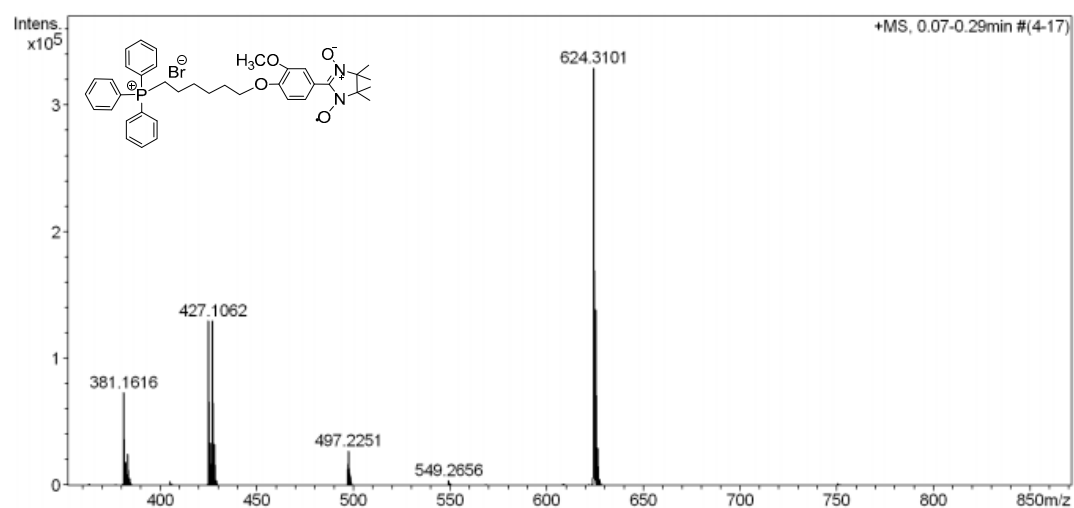

**Figure S4. The HRMS spectrum of TPP-NIT.**

### 3. Western Blot Analysis

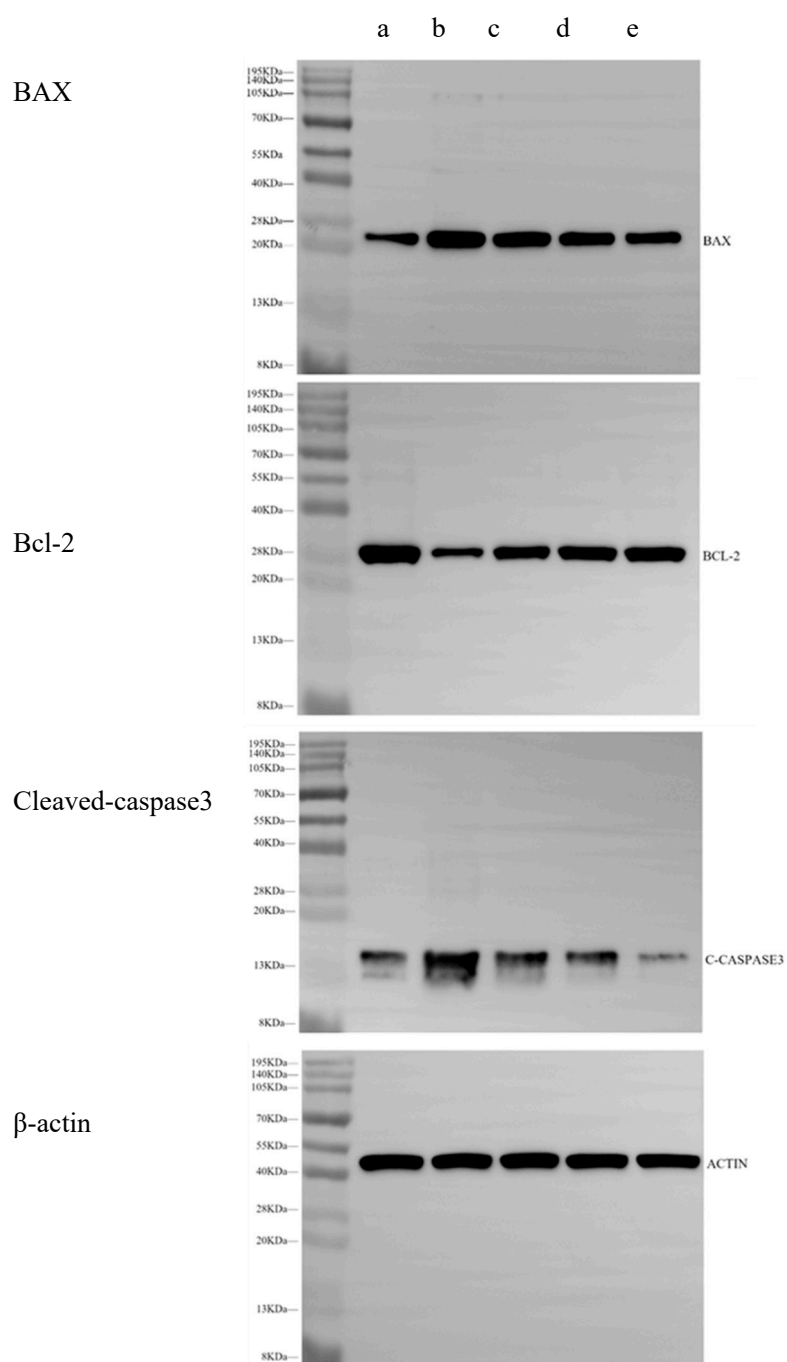

Figure S5. a, Control group; b, 6 Gy X-ray group; c, 6 Gy X-ray + 1.5  $\mu$ M WR2721 group; d, 6 Gy X-ray + 1.0  $\mu$ M TPP-NIT group; e, 6 Gy X-ray+0.15  $\mu$ M NPs-TPP-NIT

## References

- [1] Haibo Wang, Yujing Jia, Peng Gao, Ying Cheng, Ming Cheng, Chentao Lu, Siyuan Zhou, Xiaoli Sun. Synthesis, radioprotective activity and pharmacokinetics characteristic of a new stable nitronyl nitroxyl radical-NIT2011. *Biochimie* 95 (2013) 1574-1581.
